# Supplementary material
Source: ML conference proceedings conference paper supplement (https://aclanthology.org/2021.icon-main.17)

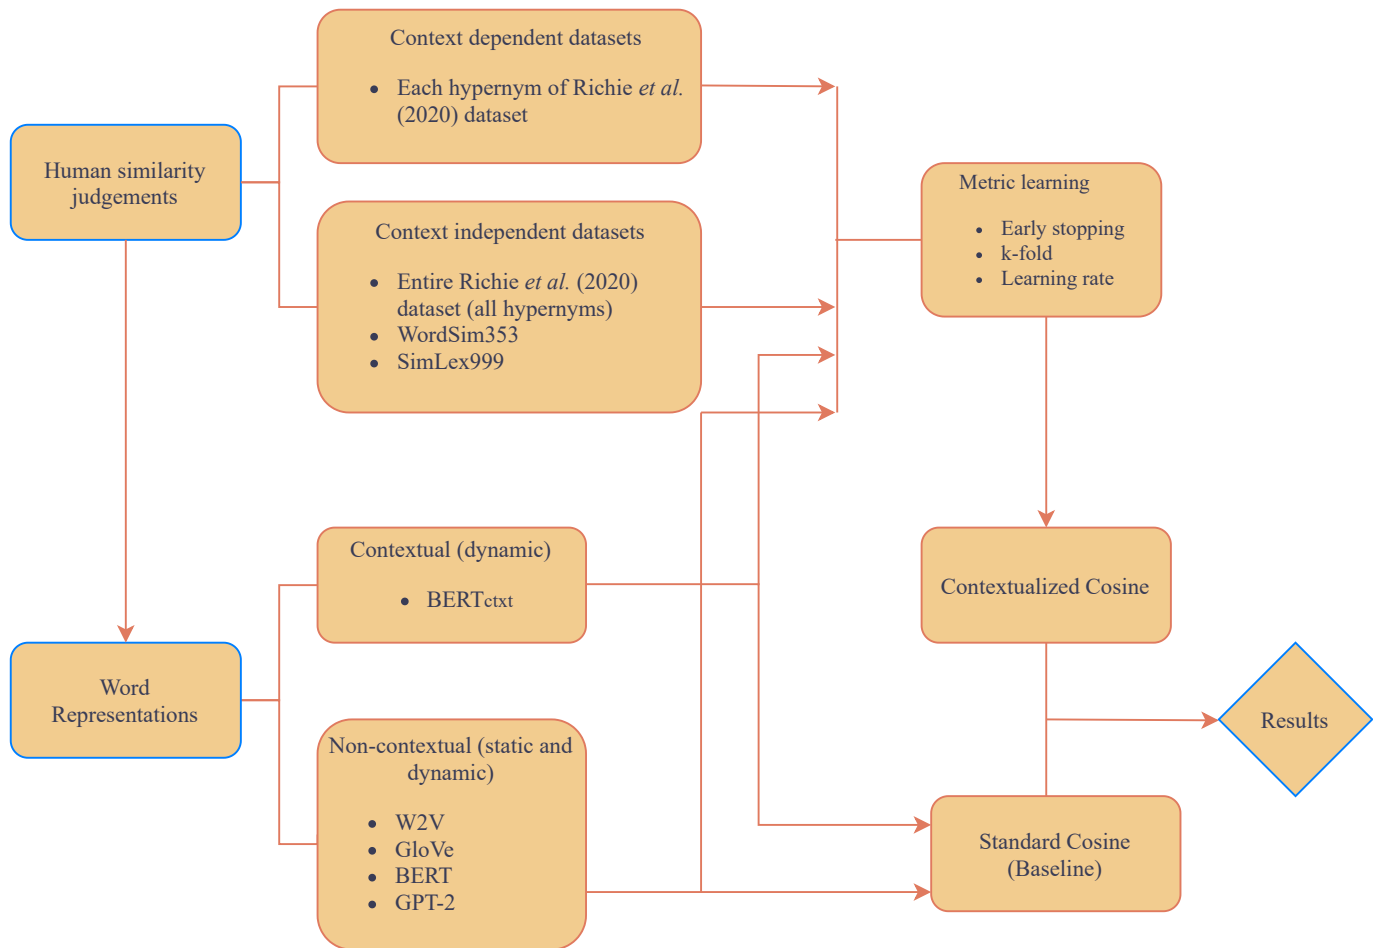

Supplement: OptionalSupplementaryMaterial [file 2021.icon-main.17.OptionalSupplementaryMaterial.zip]
